# Supplementary material for: Heterogeneous Fe3 single-cluster catalyst for ammonia synthesis via an associative mechanism
Source: PubMed Central journal article supplement (PMC5913218; doi:10.1038/s41467-018-03795-8), 2018-04-23
Supplement: 41467_2018_3795_MOESM2_ESM.pdf [file 41467_2018_3795_MOESM2_ESM.pdf]

### **Descriptions of Additional Supplementary Files**

File Name: Supplementary Movie 1

Description: AIMD trajectory showing H<sub>2</sub> dissociation on supported Fe<sub>3</sub> cluster
