# Supplementary material for: Heterogeneous Fe3 single-cluster catalyst for ammonia synthesis via an associative mechanism
Source: PubMed Central journal article supplement (PMC5913218; doi:10.1038/s41467-018-03795-8), 2018-04-23
Supplement: 41467_2018_3795_MOESM4_ESM.pdf [file 41467_2018_3795_MOESM4_ESM.pdf]

## PEER REVIEW FILE

### Reviewers' comments:

#### **Reviewer #1 (Remarks to the Author):**

The authors present a very detailed and comprehensive computational study on the  $\theta$ -Al<sub>2</sub>O<sub>3</sub>(010)-supported iron clusters for ammonia synthesis. The anchored Fe<sub>3</sub> cluster on the  $\theta$ -Al<sub>2</sub>O<sub>3</sub>(010) surface shows very low barriers for the conversion of N<sub>2</sub> to NH<sub>3</sub> via the associative mechanism, which bypasses the Brønsted-Evans-Polanyi relation for the dissociative mechanism. The topic and results are very interesting, the research is solid, and the manuscript was well organized and written. Publication is recommended after the following issues are addressed.

1. Although the authors claimed that the N-N bond cleavage from NNH species has a much lower barrier of 0.45 eV, the barrier of N<sub>2</sub> to NNH is 0.98 eV, which are still not trivial to overcome at room temperature.
2. The onset of N<sub>2</sub> reduction on the Fe<sub>3</sub> cluster anchored on Al<sub>2</sub>O<sub>3</sub> surface should be provided and compared to the previously reported electrocatalysts.
3. The solvation effect could affect the barrier or free energies due to the H-bond between O atom of H<sub>2</sub>O solvation and H atom of NRR intermediates. The authors
4. The supported Fe<sub>3</sub> clusters in very promising for ammonia synthesis form their first-principles calculations and microkinetic analysis, how to control the size of iron clusters on the  $\theta$ -Al<sub>2</sub>O<sub>3</sub>(010) surface in experiment?
5. How to determine the configurations of the most stable iron clusters on  $\theta$ -Al<sub>2</sub>O<sub>3</sub>(010) surface? And how to located the most stable anchored sites?
6. As stated in the manuscript that the triangular Fe<sub>3</sub> and pyramidal Fe<sub>4</sub> are the most stable clusters on the  $\theta$ -Al<sub>2</sub>O<sub>3</sub>(010) surface according to the calculated formation energy, will the authors present the definition of the formation energy, as well as the adsorption energy, please?
7. How stable is Fe<sub>3</sub> cluster on the  $\theta$ -Al<sub>2</sub>O<sub>3</sub>(010) surface? For example, how much is the barrier of triangular Fe<sub>3</sub> aggregation to Fe<sub>4</sub> or trailing off to Fe<sub>2</sub>? How much is barrier of the reconfiguration of Fe<sub>3</sub> cluster?
8. In the DFT computations, the lattice of the heterogeneous catalyst was fixed or relaxed?

#### **Reviewer #2 (Remarks to the Author):**

There are two proposals for catalytic N<sub>2</sub> activation, i. e., dissociative and associative activations. The former one was believed to be dominant on the surfaces of transition metals (TM such as Fe and Ru) where multiple TM atoms collaborate to weaken the N≡N triple bond. This contribution constructs a unique active site made of Fe<sub>3</sub> and Fe<sub>4</sub> clusters anchored on the surface of Al<sub>2</sub>O<sub>3</sub>, who can activate N<sub>2</sub> via an energy-favored H associative pathway. The activity of such site surpasses C7 of Fe and is comparable with B5 site of Ru under 700K and 100 bar.

The authors present detailed calculations and make a reasonable comparison of the elementary steps of the Fe<sub>3</sub>/Al<sub>2</sub>O<sub>3</sub> site and Fe (211), allowing in-depth understanding on the electronic structure vs. catalytic activity.

Minor revision is suggested.

I would like to discuss the following points with the authors.

1. There are a few steps that need to overcome barriers higher than 1.0 eV. If I am correct, those steps are related to transferring H to NH<sub>x</sub>. The electronic state of H may be crucial, i. e., if H is atomic, hydridic or protic, its affinity towards N may be different. I am not clear in the Fe<sub>3</sub>/Al<sub>2</sub>O<sub>3</sub> system whether H<sub>2</sub> undergoes homogeneous splitting or not. Because O is nearby, will H also set up bonding with O? I guess the activation of H<sub>2</sub> on the pre-N<sub>2</sub> occupied site would be very different from the clean site.
2. The Fe<sub>3</sub>/Al<sub>2</sub>O<sub>3</sub> may be treated as a multi-functional site, because N can be hosted by Fe<sub>3</sub> and by the interface of Fe-O-Al. The correlation of absorption energies of reacting species may be thus complicated and shows certain differences from the conventional BEP. However, if Fe was replaced by Co, Ru, Ni etc., will a volcano be also observed?
3. I would like to suggest the authors to discuss a bit more on the strategic design of catalyst that may lead to better low-temperature activity via H-associated pathway. The authors analyzed nicely the bader charge and bond length of reacting species on Fe<sub>3</sub>/Al<sub>2</sub>O<sub>3</sub>. Will the change of support and variation of transition metal help with the reduction of kinetic barrier while maintaining the structure stable? How? I believe such discussion will be appreciated by the community.

## Responses to Referees' Comments

Thanks to the referees' suggestions and comments that have helped us to improve the manuscript. We have taken into account of all the suggestions. The manuscript is thoroughly revised now. Below are the responses to the questions. The original comments are listed in *italics* while our responses are shown in blue color for clarity.

*Reviewers' comments:*

**Reviewer #1 (Remarks to the Author):**

*The authors present a very detailed and comprehensive computational study on the  $\theta$ -Al<sub>2</sub>O<sub>3</sub>(010)-supported iron clusters for ammonia synthesis. The anchored Fe<sub>3</sub> cluster on the  $\theta$ -Al<sub>2</sub>O<sub>3</sub>(010) surface shows very low barriers for the conversion of N<sub>2</sub> to NH<sub>3</sub> via the associative mechanism, which bypasses the Brønsted-Evans-Polanyi relation for the dissociative mechanism. The topic and results are very interesting, the research is solid, and the manuscript was well organized and written. Publication is recommended after the following issues are addressed.*

**Response:** We thank the reviewer for the positive assessment of our work.

*1. Although the authors claimed that the N-N bond cleavage from NNH species has a much lower barrier of 0.45 eV, the barrier of N<sub>2</sub> to NNH is 0.98 eV, which are still not trivial to overcome at room temperature.*

**Response:** The referee raised a very good point. Indeed a barrier of 0.98 eV (~22 kcal/mol) is not trivial to overcome at room temperature, but comparable kinetics to that of industrial process (700 K) could be achieved at around 500 K, which is a solid step to lower the working temperature. More importantly here is that the associative mechanism also changes the rate determine step (RDS) from N-N bond cleavage to the hydrogenation steps, so the kinetics is liberated from the limitation due to the BEP relation and the system could be further optimized, e.g., via increasing the active centers on the surfaces. We have modified the manuscript to de-emphasize the "room-temperature" activation by the following changes: driven over with low temperature → driven over with relatively low temperature. (p.6); While this study

focus on the  $\text{Fe}_3/\text{Al}_2\text{O}_3$  system, it is conceivable that change of support can influence the charge state of the metal cluster and alteration of the transition metal can also affect the N-NH bond breaking barrier. (p.14).

2. *The onset of  $\text{N}_2$  reduction on the  $\text{Fe}_3$  cluster anchored on  $\text{Al}_2\text{O}_3$  surface should be provided and compared to the previously reported electrocatalysts.*

**Response:** We thank the reviewer for the suggestion. The associative mechanism of  $\text{N}_2$  activation on  $\text{Fe}_3$  cluster is similar to the nitrogen reduction reaction (NRR) process on electrocatalysts, but the scenario we considered here is thermal catalysis. As is well known, a major difference between electrocatalysis and thermocatalysis is the driving force: for the electrocatalytic NRR, the driving force is from the voltage, as  $^*\text{N}_2 + \text{H}^+ + e^- \rightarrow ^*\text{NNH}$  requires the minimum voltage of  $U = \Delta G/e^-$ ; for the thermocatalysis, the driving force is from the thermal energy, as  $^*\text{N}_2 + ^*\text{H} \rightarrow ^*\text{NNH}$  requires a certain temperature at a given pressure based on the reaction barrier  $\Delta G^\ddagger$  to deliver significant kinetics. We add the following sentence to address this issue: As is shown early (see also the movie file in the supplementary material),  $\text{N}_2$  is firstly activated on  $\text{Fe}_3$  active center followed by attacking by dissociated H atom, which differs from the procedure in electrochemical condition where proton attacks the adsorbed  $\text{N}_2$  in solution. (p. 7)

3. *The solvation effect could affect the barrier or free energies due to the H-bond between O atom of  $\text{H}_2\text{O}$  solvation and H atom of NRR intermediates. The authors*

**Response:** The referee raised an interesting question that would be essential for catalysis with solid-liquid interface. Indeed in modeling the electrocatalytic NRR, the solvent effect is truly crucial to accurate prediction of free energy profiles. But we focus here on the thermocatalysis, where the hydrogens are from gas phase and there is no  $\text{H}_2\text{O}$  solvation. However, we feel it is good to mention this point so we added the following in the revised version: The procedure of  $\text{N}_2$  activation and hydrogenation can be affected by moisture or solvents if existing. (p.14)

4. *The supported  $\text{Fe}_3$  clusters in very promising for ammonia synthesis from their first-principles calculations and microkinetic analysis, how to control the size of iron clusters on the  $\theta\text{-Al}_2\text{O}_3(010)$  surface in experiment?*

**Response:** We thank the reviewer for this good question. Precise control of the size of clusters adsorbed on support surfaces could be realized with the developments of experimental techniques such as: (1)

adsorbed trimer ( $M_3$ ) clusters can be obtained from well-defined  $M_3(CO)_n$  precursors with thermal treatment under confinement (*J. Am. Chem. Soc.* **2017**, *139*, 9795-9798); (2) trimer clusters can be mass-selected using a quadrupole mass filter and deflector assembly and deposited on the support (*Science* **2010**, *328*, 224-228). There are quite some publications on precise control of size-selected clusters. We are in contact with some experimentalists to exploring this possibility. We add the this sentence to reveal the possible preparation: This type of Fe clusters on alumina surface may be experimentally prepared by soft-landing cluster method or thermal treatment of ligated tri-iron cluster (e.g.,  $Fe_3(CO)_n$ ). (p.3)

5. *How to determine the configurations of the most stable iron clusters on  $\theta$ -Al<sub>2</sub>O<sub>3</sub>(010) surface? And how to located the most stable anchored sites?*

**Response:** This is an important point. Global minimum search techniques have been used in our previous work to determine the most stable configurations and anchored sites for large clusters, such as  $B_{40}$  clusters and  $Au_7$  clusters on  $Al_2O_3$  surface (*Nat. Chem.* **2014**, *6*, 727-731; *ACS Catal.* **2016**, *6*, 2525-2535). However, based on our previous experience, for the  $Fe_3$  cluster considered here, the number of atoms is so small that all the possible configurations can be determined by direct optimization of many different initial configurations (Figure S4a). We also used the *ab initio* molecular dynamics (AIMD) simulation to further confirm the stability (Figure S5). Therefore we determined that the current configuration of iron clusters on  $\theta$ - $Al_2O_3$ (010) surface is the most stable one. We tested all the possible anchoring sites and the proposed one is the energetically preferred one.

6. *As stated in the manuscript that the triangular  $Fe_3$  and pyramidal  $Fe_4$  are the most stable clusters on the  $\theta$ -Al<sub>2</sub>O<sub>3</sub>(010) surface according to the calculated formation energy, will the authors present the definition of the formation energy, as well as the adsorption energy, please?*

**Response:** We thank the reviewer for pointing this out. We are sorry that we were not clear enough on these points. The definitions are now given in the revised version.

In Figure S2, the formation energy of adsorbed iron clusters is defined as  $E_f = E(Fe_n/Al_2O_3) - E(Al_2O_3) - nE(Fe)$ , where  $E(Fe_n/Al_2O_3)$  is the total energy of  $Al_2O_3$  surface with  $Fe_n$  adsorbed,  $E(Al_2O_3)$  is the energy of pristine  $Al_2O_3$  surface, and  $E(Fe)$  is the energy per atom of Fe metal. So the formation energy includes both the formation energy of gas phase  $Fe_n$  cluster and its binding energy on surface. Therefore, we can directly evaluate the stability by  $E_f$ .

In Figure S4, the binding energy of  $\text{Fe}_3$  cluster is defined as  $E_{bind} = E(\text{Fe}_3/\text{Al}_2\text{O}_3) - E(\text{Al}_2\text{O}_3) - E(\text{Fe}_3)$ , where  $E(\text{Fe}_3)$  is the energy of gas phase  $\text{Fe}_3$  cluster. The adsorption energies of molecules are defined as  $E_{ads}(X) = E(X/\text{Al}_2\text{O}_3) - E(\text{Al}_2\text{O}_3) - E(X)$ , where X can be  $\text{H}_2$ ,  $\text{N}_2$ , and  $\text{NH}_3$ . The adsorption energy of N atom is defined as  $E_{ads}(\text{N}) = 1/2 (E(2\text{N}/\text{Al}_2\text{O}_3) - E(\text{Al}_2\text{O}_3) - E(\text{N}_2))$ , where  $E(2\text{N}/\text{Al}_2\text{O}_3)$  is the total energy for  $\text{N}_2$  dissociative adsorption. We have now added these definitions in the Methods part.

7. How stable is  $\text{Fe}_3$  cluster on the  $\theta\text{-Al}_2\text{O}_3(010)$  surface? For example, how much is the barrier of triangular  $\text{Fe}_3$  aggregation to  $\text{Fe}_4$  or trailing off to  $\text{Fe}_2$ ? How much is barrier of the reconfiguration of  $\text{Fe}_3$  cluster?

**Response:** We thank the reviewer for these good questions. To evaluate the stability of  $\text{Fe}_3$  on  $\theta\text{-Al}_2\text{O}_3(010)$  surface, we calculated here the dissociation of  $\text{Fe}_3$  to  $\text{Fe}_2$  and  $\text{Fe}_1$  (Figure R1a), and the aggregation of  $\text{Fe}_3$  and  $\text{Fe}_1$  into  $\text{Fe}_4$  (Figure R1b). Barriers for both processes are rather high, more than 2 eV. Although the aggregation of  $\text{Fe}_3$  to  $\text{Fe}_4$  is slightly exothermic, the barrier is as high as 2.72 eV. Therefore, we expect that the  $\text{Fe}_3$  clusters are kinetically very stable on  $\theta\text{-Al}_2\text{O}_3(010)$  surface when formed beforehand. We also tested the reconfiguration of  $\text{Fe}_3$  cluster from the horizontal one to vertical one, and found a barrier of more than 1 eV. We have added these descriptions in the Figure S2 of the Supplementary materials.

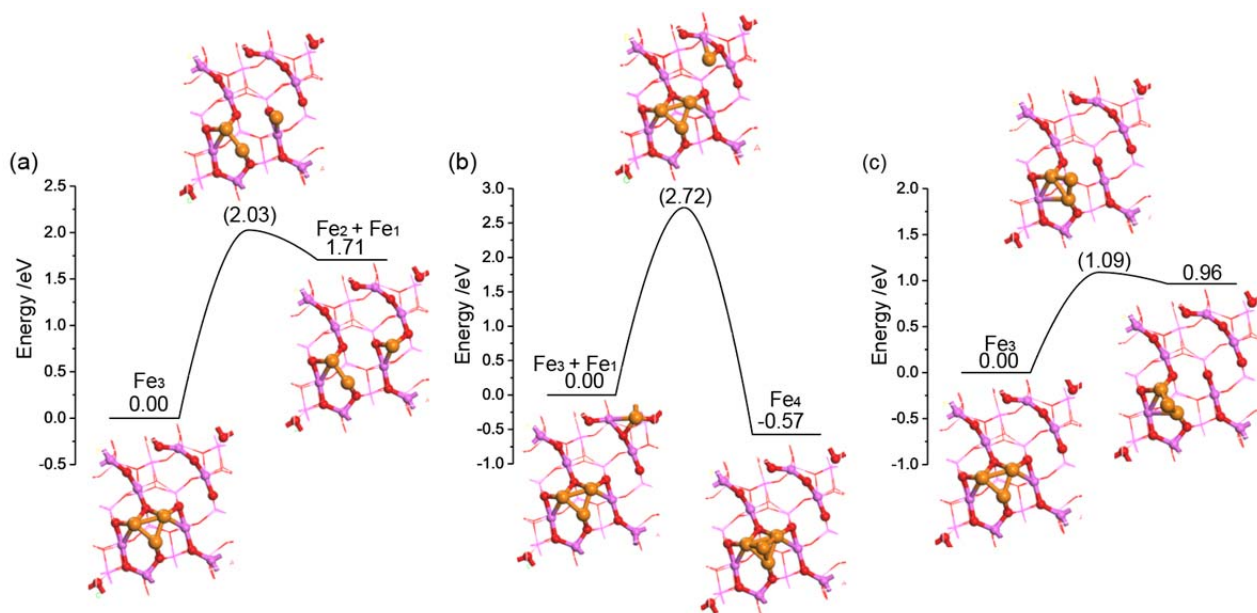

**Figure R1.** Energy profiles and corresponding configurations of (a) the dissociation of  $\text{Fe}_3$  to  $\text{Fe}_2$  and  $\text{Fe}_1$ , (b) the aggregation of  $\text{Fe}_3$  and  $\text{Fe}_1$  to  $\text{Fe}_4$ , and (c) the reconfiguration of  $\text{Fe}_3$  cluster.

8. In the DFT computations, the lattice of the heterogeneous catalyst was fixed or relaxed?

**Response:** All the atomic positions (except the bottom two Al-O layers) were relaxed. But the slab lattice parameters were fixed to the optimized cell parameters of bulk  $\theta$ -Al<sub>2</sub>O<sub>3</sub>, in order to mimic the support bulk. This is now mentioned in the methods part.

**Reviewer #2 (Remarks to the Author):**

*There are two proposals for catalytic N<sub>2</sub> activation, i. e., dissociative and associative activations. The former one was believed to be dominant on the surfaces of transition metals(TM such as Fe and Ru) where multiple TM atoms collaborate to weaken the N≡N triple bond. This contribution constructs a unique active site made of Fe<sub>3</sub> and Fe<sub>4</sub> clusters anchored on the surface of Al<sub>2</sub>O<sub>3</sub>, who can activate N<sub>2</sub> via an energy-favored H associative pathway. The activity of such site surpasses C7 of Fe and is comparable with B5 site of Ru under 700K and 100 bar.*

*The authors present detailed calculations and make a reasonable comparison of the elementary steps of the Fe<sub>3</sub>/Al<sub>2</sub>O<sub>3</sub> site and Fe (211), allowing in-depth understanding on the electronic structure vs. catalytic activity.*

**Response:** We thank the reviewer for the positive assessment of our work.

*Minor revision is suggested.*

*I would like to discuss the following points with the authors.*

*1. There are a few steps that need to overcome barriers higher than 1.0 eV. If I am correct, those steps are related to transferring H to NH<sub>x</sub>. The electronic state of H may be crucial, i. e., if H is atomic, hydridic or protic, its affinity towards N may be different. I am not clear in the Fe<sub>3</sub>/Al<sub>2</sub>O<sub>3</sub> system whether H<sub>2</sub> undergoes homogeneous splitting or not. Because O is nearby, will H also set up bonding with O? I guess the activation of H<sub>2</sub> on the pre-N<sub>2</sub> occupied site would be very different from the clean site.*

**Response:** We thank the reviewer for the profound analysis and very good question. H<sub>2</sub> undergoes homogeneous splitting, and then the two H become hydrides with partial oxidation of the Fe<sub>3</sub> cluster. We have the ab initio molecular dynamics (AIMD) results for H<sub>2</sub>'s dissociative adsorption on Fe<sub>3</sub>/θ-Al<sub>2</sub>O<sub>3</sub>. Please see attached **Movie** that is now provided as supplementary material. Three different scenarios were considered.

- (1) When H<sub>2</sub> approaches the bare Al<sub>2</sub>O<sub>3</sub> surface, it always rebounds, because the surface Al sites are fully coordinated.
- (2) When H<sub>2</sub> approaches the Fe<sub>3</sub> cluster, it dissociates from a  $\mu_2\text{-}\eta^2:\eta^1$  configuration.
- (3) When H<sub>2</sub> approaches the Fe<sub>3</sub>/θ-Al<sub>2</sub>O<sub>3</sub> interface, no heterogeneous splitting is observed in our AIMD simulation.

To further evaluate the pathways (2) and (3), we performed static DFT calculations. Energy profiles and Bader charge analyses are shown below in Figures R2 and R3. The barrier for homogeneous splitting is only 0.08 eV, which is much lower than that for the heterogeneous splitting (1.34 eV). This is because the interface oxygen is coordinated with two Al and one Fe, and does not favor another proton. The homogenous splitting leads to oxidation of Fe<sub>3</sub> cluster and two hydrides that are responsible for the reduction of N<sub>2</sub>, which has now been fully discussed in our manuscript. We have added these descriptions in the Figure S9.

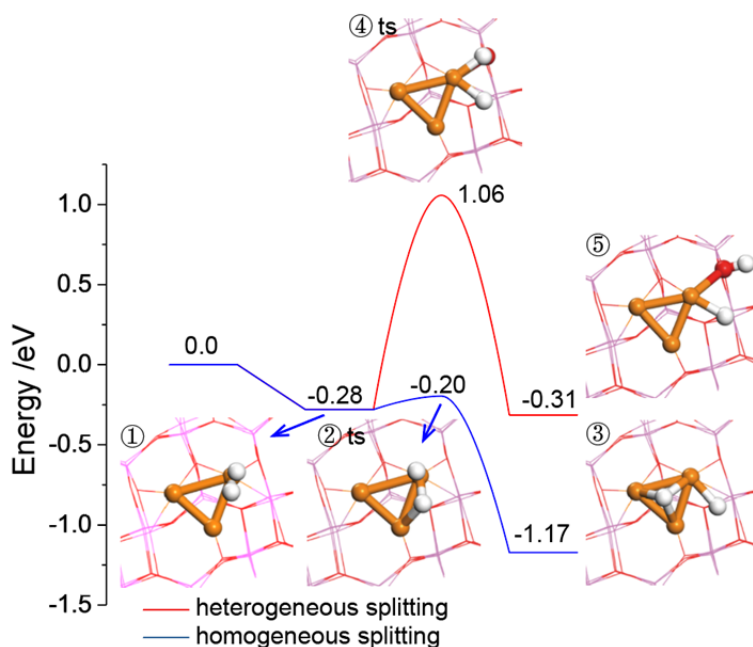

**Figure R2.** Homogenous (blue) and heterogeneous (red) splitting pathways at the Fe<sub>3</sub> cluster and Fe<sub>3</sub>/Al<sub>2</sub>O<sub>3</sub> interface.



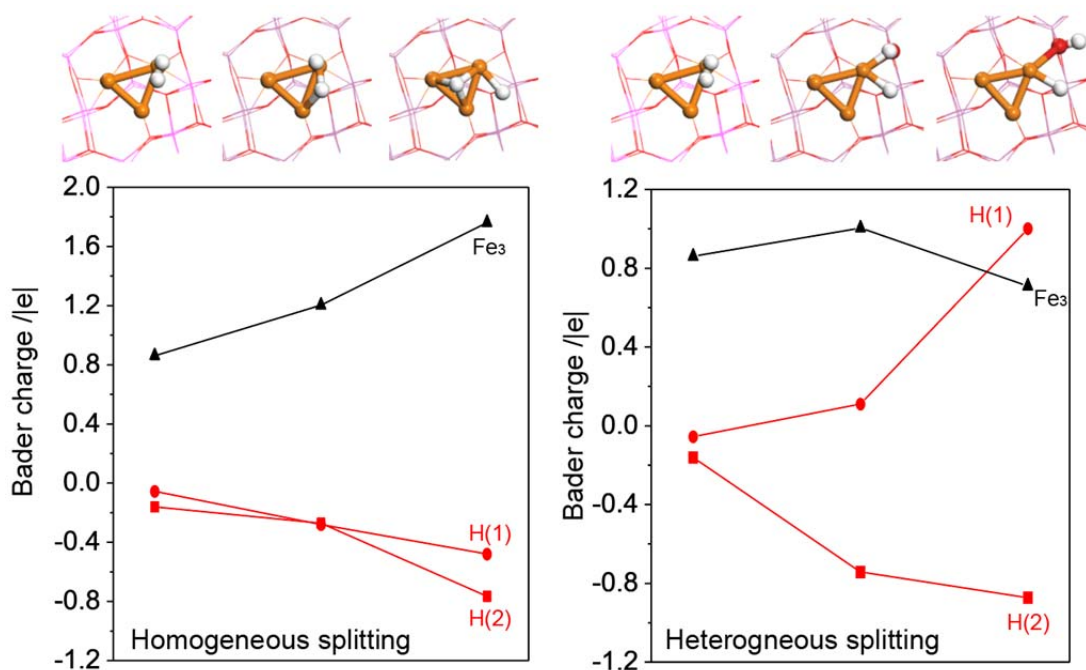

**Figure R3.** Bader charge changes of the two H and the Fe<sub>3</sub> cluster during the H<sub>2</sub> dissociative adsorption step.

We also considered the H<sub>2</sub> activation pathway with pre-N<sub>2</sub> occupation. Under this circumstance, H<sub>2</sub> also undergoes homogenous dissociation with a barrier of only 0.05 eV as shown below in Figure R4.

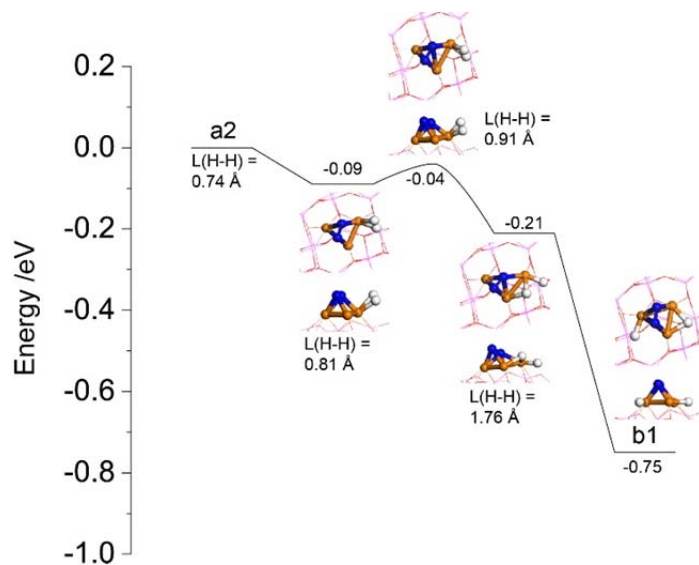

**Figure R4.** Energy profile of H<sub>2</sub> splitting pathway with pre-N<sub>2</sub> adsorption.

2. The Fe<sub>3</sub>/Al<sub>2</sub>O<sub>3</sub> may be treated as a multi-functional site, because N can be hosted by Fe<sub>3</sub> and by the

*interface of Fe-O-Al. The correlation of absorption energies of reacting species may be thus complicated and shows certain differences from the conventional BEP. However, if Fe was replaced by Co, Ru, Ni etc., will a volcano be also observed?*

**Response:** This is certainly a very good point. We are currently working on exploring different metals and has found a preliminary result that is beyond the conventional BEP. Combined with the trend in desorption energies of  $\text{NH}_x$ , we expect to see a new volcano curve for ammonia synthesis on  $\text{M}_3$  clusters. We will also work with experimentalists to verify this kind of finding in the future.

*3. I would like to suggest the authors to discuss a bit more on the strategic design of catalyst that may lead to better low-temperature activity via H-associated pathway. The authors analyzed nicely the bader charge and bond length of reacting species on  $\text{Fe}_3/\text{Al}_2\text{O}_3$ . Will the change of support and variation of transition metal help with the reduction of kinetic barrier while maintaining the structure stable? How? I believe such discussion will be appreciated by the community.*

**Response:** We thank the reviewer for this very good suggestion.

- (1) Change of support will influence the charge state of metal cluster. An electron donor will be more preferred for  $\text{N}_2$  activation and  $\text{N}_2\text{H}_x$  dissociation. For example, using electride complexes  $\text{C}_{12}\text{A}_7:e^-$  (*Nat. Chem.* **2012**, 4, 934-940) or LiH support (*Nat. Chem.* **2017**, 9, 64-70) can improve the activity dramatically.
- (2) Changing the transition metal will influence the N-NH bond breaking barrier as discussed in our previous response, and also change the  $\text{NH}_x$  desorption energies. So finding the new volcano curve peak can give us some hints to design more effective catalysts.

We will discuss these in our future work, since they will compose a few complete stories that need much more calculations to support them. Given the vast volume of material of the current manuscript, the immature nature of the new data of different metals/support, and the large amount of computational and experimental work still needed, such preliminary results are not included here and will be another complete story in the future. We add the following in the revised paper: **While this study focus on the  $\text{Fe}_3/\text{Al}_2\text{O}_3$  system, it is conceivable that change of support can influence the charge state of the metal cluster and alteration of the transition metal can also affect the N-NH bond breaking barrier. Especially, the procedure of  $\text{N}_2$  activation and hydrogenation can be affected by moisture or solvents if existing. Further study of the optimal surface metal clusters and support for  $\text{N}_2$ -to- $\text{NH}_3$**

conversion under different chemical conditions will be interesting. The nature of the surface single-cluster catalysts will likely offer high selectivity like single-atom catalysts.

## **Reviewers' Comments:**

### **Reviewer #1 (Remarks to the Author):**

The authors well addressed my concerns in the previous report, and the manuscript has been greatly improved. Publication is recommended.

### **Reviewer #2 (Remarks to the Author):**

Ammonia synthesis from N<sub>2</sub> and H<sub>2</sub> is an "elegant" reaction. However, ammonia synthesis under mild-condition is a grand challenge. The present work shows nicely that a smart catalyst design opens a new possibility to address such a challenge. The revision has been done satisfactorily, and I would suggest accepting this work for publication.
